# Supplementary material
Source: publisher figshare collection journal article supplement (https://acs.figshare.com/ndownloader/files/7727155)

## Supplementary Material

In S1, we show the enthalpy during dissolution simulations along with model fits used to estimate  $\sigma$ . In S2, we show the full average dissolution trajectory for each polymorph, along with the model fit.

**S1:** dissolution enthalpies (kcal/mol) vs. time (ns) for (A)  $\alpha$ -, (B)  $\beta$ -, and (C)  $\gamma$ -glycine nanocrystals. Red corresponds to the 1.85 nm particle, green to the 2 nm particle, dark blue to the 2.15 nm particle, grey to the 2.3 nm particle, orange to the 2.45 nm particle, pink to the 2.6 nm particle, and light blue to the 3 nm particle. Dashed black lines correspond to the model fits.

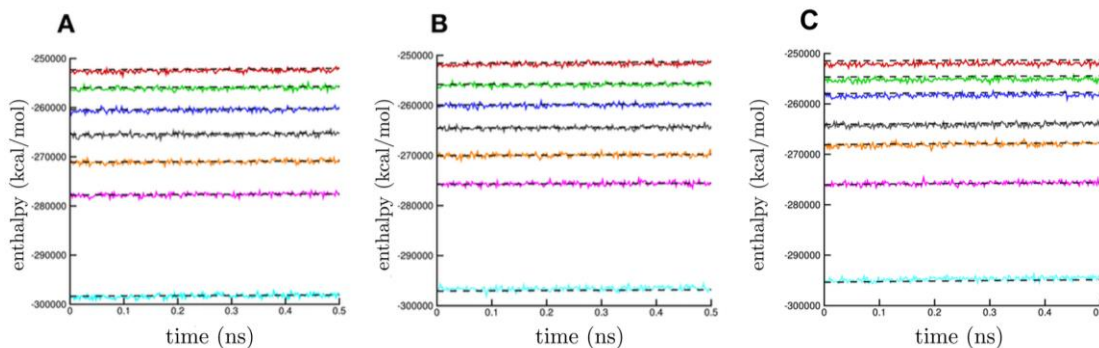

**S2:** number of solid molecules vs. time (ns) for all (A)  $\alpha$ -, (B)  $\beta$ -, and (C)  $\gamma$ -glycine nanocrystals. Red corresponds to the 1.85 nm particle, green to the 2 nm particle, dark blue to the 2.15 nm particle, grey to the 2.3 nm particle, orange to the 2.45 nm particle, pink to the 2.6 nm particle, and light blue to the 3 nm particle.  $n_\alpha$  corresponds to the number of solid  $\alpha$ - particles.  $n_\beta$  corresponds to the number of solid  $\beta$ - particles.  $n_\gamma$  corresponds to the number of solid  $\gamma$ - particles. Dashed black lines correspond to the model fits.

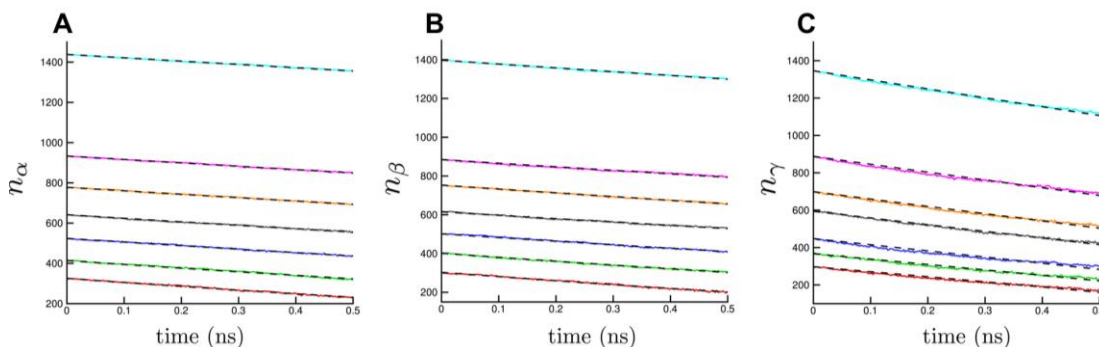

Supplement: Supplementary file 1 [file 7727155]
